# Supplementary material for: Influence of the Post-Harvest Storage Time on the Multi-Biological Potential, Phenolic and Pyrrolizidine Alkaloid Content of Comfrey (Symphytum officinale L.) Roots Collected from Different European Regions
Source: MDPI journal article supplement (doi:10.3390/plants10091825), 2021-09-02
Supplement: s1 [file s1]

**Table S1**

Identification data of comfrey root samples

| <b>Sample code</b> | <b>Country</b> | <b>Place</b> | <b>GPS</b>             | <b>Voucher</b> |
|--------------------|----------------|--------------|------------------------|----------------|
| <i>FS</i>          | Germany        | Freising     | 48.400335, 11.723935   | SO0310/2020FS  |
| <i>IS</i>          | Romania        | Iasi         | 47.187379, 27.574481   | SO0210/2020IS  |
| <i>NT</i>          | Romania        | Neamt        | 46.845291, 26.887946   | SO2609/2020NT  |
| <i>CH</i>          | Switzerland    | Uttwil       | 47.5832514, 9.3426943  | SO2409/2020CH  |
| <i>PL</i>          | Poland         | Lublin       | 51.2565091, 22.5624355 | SO0110/2020PL  |
